# Supplementary material for: An optical sensor for the sensitive determination of formaldehyde gas based on chromotropic acid and 4-aminoazobenzene immobilized in a hydrophilic membrane
Source: Royal Society of Chemistry journal article supplement (doi:10.1039/d3an01056b), 2023-01-01
Supplement: d3an01056b1.pdf [file d3an01056b1.pdf]

## Supplementary Information

### Optical sensor for the sensitive determination of formaldehyde gas based on chromotropic acid and 4-aminoazobenzene immobilized in a hydrophilic membrane

M.D. Fernández-Ramos<sup>\*a,b</sup>, A. Moraga-Cabezas<sup>a</sup>, Antonio L. Medina-Castillo<sup>\*a,b</sup> and L.F. Capitán-Vallvey<sup>a,b</sup>

<sup>a</sup>ECsens. Department of Analytical Chemistry, University of Granada, Granada 18071 (Spain).

<sup>b</sup>Unit of Excellence in Chemistry applied to Biomedicine and the Environment of the University of Granada (Spain)

\*e-mail: [mdframos@ugr.es](mailto:mdframos@ugr.es); \*email: [antonioluismedina@ugr.es](mailto:antonioluismedina@ugr.es)

#### 1. Image of measurement system.

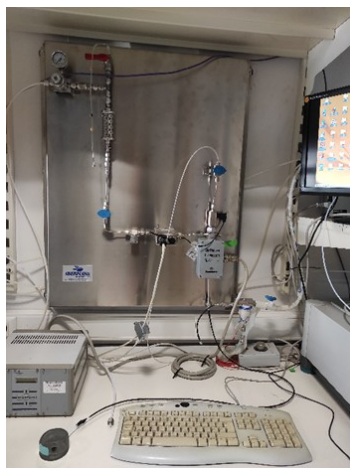

Fig. 1S. Image of Controlled Evaporator Mixer system (CEM) and homemade climate chamber with the Color-NSPs inside.

#### 2. Selection of the Colour coordinate.

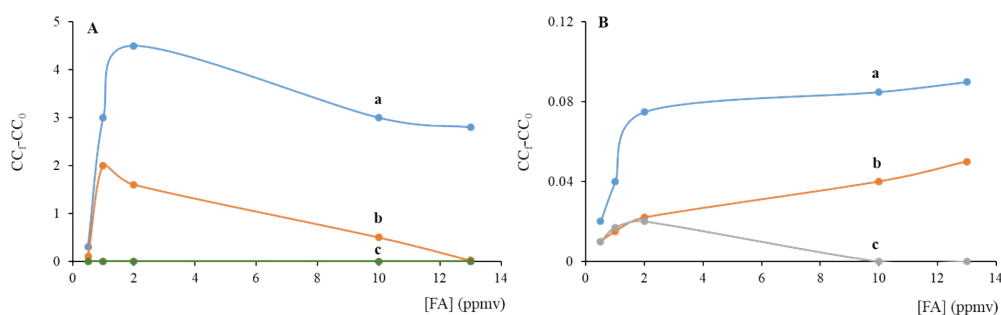

Figure 2S. Colour coordinates versus concentration of formaldehyde: A) colour space RGB: a R-R<sub>0</sub>; b G-G<sub>0</sub>; c B-B<sub>0</sub>; B) colour space HSV: a H-H<sub>0</sub>; b S-S<sub>0</sub>; c V-V<sub>0</sub>.

### 3. Optimization of contact time between the sensor and formaldehyde atmosphere.

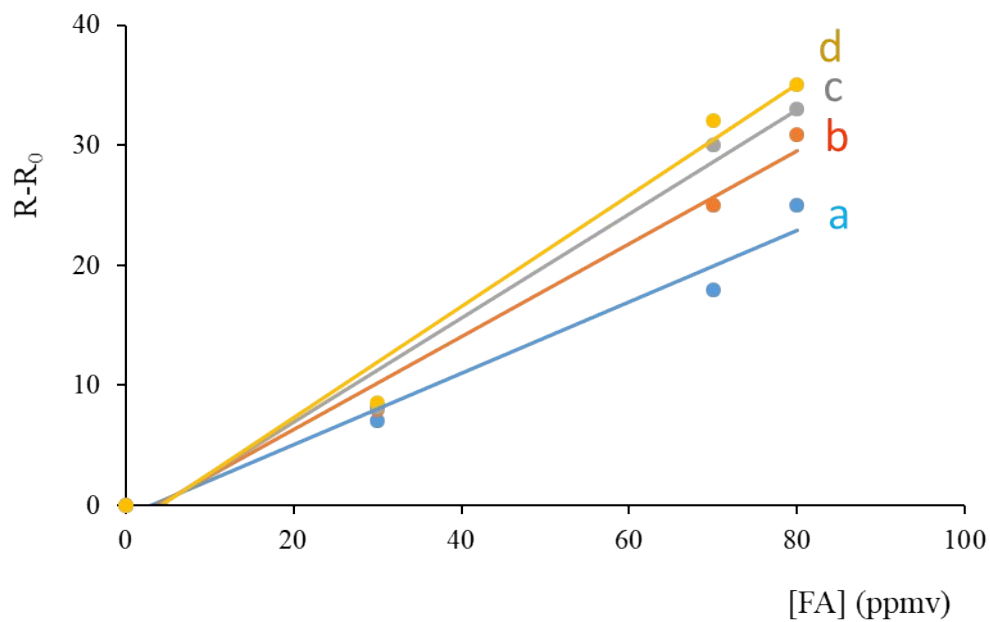

Figure 3S. Contact time between the sensor and formaldehyde atmosphere; a) 5 min; b) 15 min.; c) 20 min; d) 30 min.

### 4. Calibration plot

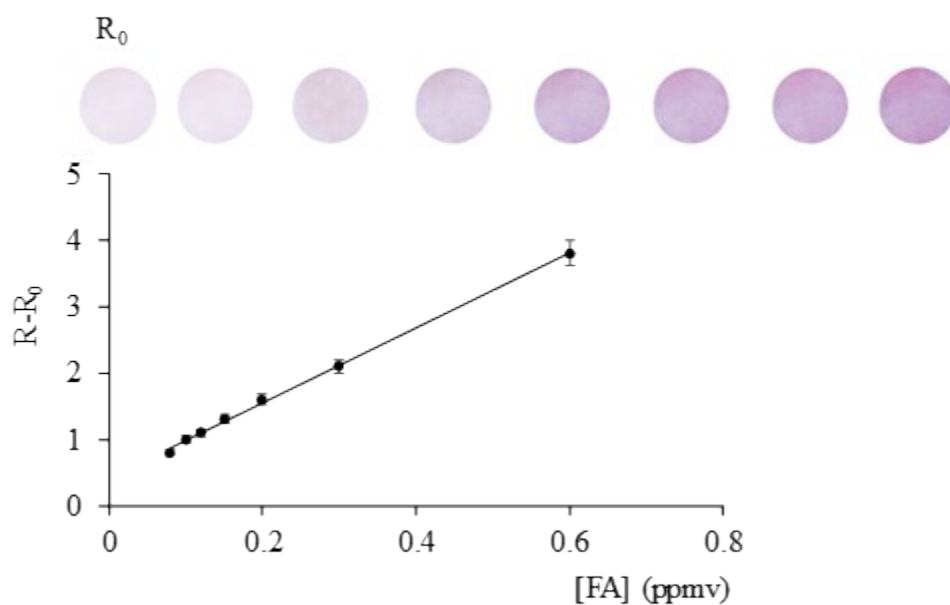

Figure 4S. Calibration plot at 55% RH in 0.08-0.6 ppmv FA range.

## 5. Reversibility study

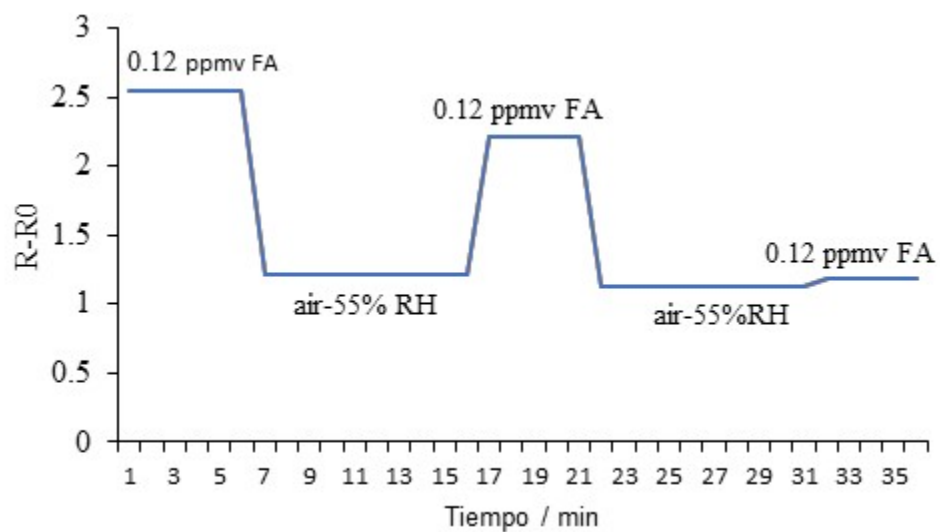

Figure 5S. Sensor exposure cycles at 0.12 ppmv FA and air-55%RH alternately.

## 6. The lifetime of sensing membranes

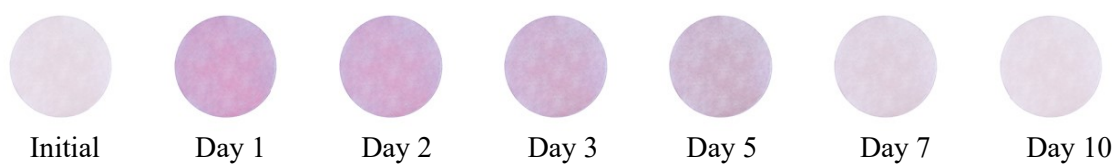

Figure 6S. Sensor image as a function of time when exposed to a constant concentration of 0.12 ppmv FA
